# Supplementary material for: Using activity and sociability to characterize collective motion
Source: PubMed Central journal article supplement (PMC5882985; doi:10.1098/rstb.2017.0015), 2018-03-26
Supplement: rstb20170015supp1.pdf [file rstb20170015supp1.pdf]

# Using activity and sociability to characterise collective motion: Supplementary Information

December 1, 2017

## A Correlation matrices

|                         | $S_i$  | $T_i$  | $D_i$  | $C_i$  | $R_i$  | $A_i$  | $N_i$  | $G_i$  |
|-------------------------|--------|--------|--------|--------|--------|--------|--------|--------|
| speed $S_i$             | 1.000  | -0.544 | 0.134  | 0.568  | -0.186 | 0.717  | -0.225 | 0.367  |
| turning rate $T_i$      | -0.544 | 1.000  | 0.041  | -0.393 | -0.049 | -0.691 | 0.138  | -0.412 |
| dist. from centre $D_i$ | 0.134  | 0.041  | 1.000  | -0.212 | -0.038 | -0.201 | 0.181  | -0.441 |
| speed corr. $C_i$ :     | 0.568  | -0.393 | -0.212 | 1.000  | -0.207 | 0.621  | -0.458 | 0.577  |
| reaction time $R_i$     | -0.186 | -0.049 | -0.038 | -0.207 | 1.000  | -0.151 | 0.261  | -0.156 |
| n.n. align $A_i$        | 0.717  | -0.691 | -0.201 | 0.621  | -0.151 | 1.000  | -0.538 | 0.740  |
| n.n. dist. $N_i$        | -0.225 | 0.138  | 0.181  | -0.458 | 0.261  | -0.538 | 1.000  | -0.636 |
| group size $G_i$        | 0.367  | -0.412 | -0.441 | 0.577  | -0.156 | 0.740  | -0.636 | 1.000  |

Table 1: Correlation matrix for female data in the selection experiment.

|                         | $S_i$  | $T_i$  | $D_i$  | $C_i$  | $R_i$  | $A_i$  | $N_i$  | $G_i$  |
|-------------------------|--------|--------|--------|--------|--------|--------|--------|--------|
| speed $S_i$             | 1.000  | -0.662 | -0.130 | 0.482  | -0.267 | 0.787  | -0.277 | 0.453  |
| turning rate $T_i$      | -0.662 | 1.000  | 0.060  | -0.351 | 0.128  | -0.738 | 0.162  | -0.374 |
| dist. from centre $D_i$ | -0.130 | 0.060  | 1.000  | 0.033  | -0.069 | 0.009  | -0.214 | 0.147  |
| speed corr. $C_i$ :     | 0.482  | -0.351 | 0.033  | 1.000  | -0.217 | 0.559  | -0.356 | 0.536  |
| reaction time $R_i$     | -0.267 | 0.128  | -0.069 | -0.217 | 1.000  | -0.277 | 0.322  | -0.285 |
| n.n. align $A_i$        | 0.787  | -0.738 | 0.009  | 0.559  | -0.277 | 1.000  | -0.425 | 0.666  |
| n.n. dist. $N_i$        | -0.277 | 0.162  | -0.214 | -0.356 | 0.322  | -0.425 | 1.000  | -0.581 |
| group size $G_i$        | 0.453  | -0.374 | 0.147  | 0.536  | -0.285 | 0.666  | -0.581 | 1.000  |

Table 2: Correlation matrix for male data in the selection experiment.

## B Factor analysis: Robustness

When data was combined, the individual datasets were first centred and normalised. Larger datasets were sampled at random to equal the size of the smallest dataset. Factor tables on the left are computed using all eight measures, while tables on the right are computed without the reaction time measure. For each table, factors are ordered by the amount of variation explained.

| Females: Selection (N=232) |                   |                      |                   | <i>No reaction time</i> |                   |                      |
|----------------------------|-------------------|----------------------|-------------------|-------------------------|-------------------|----------------------|
|                            | Activity<br>(27%) | Sociability<br>(20%) | Factor 3<br>(18%) |                         | Activity<br>(36%) | Sociability<br>(24%) |
| speed                      | 0.61              |                      | 0.77              | speed                   | 0.83              |                      |
| turning rate               | -0.99             |                      |                   | turning rate            | -0.72             |                      |
| dist. from centre          |                   | -0.55                |                   | dist. from centre       |                   | -0.56                |
| speed corr.                | 0.40              |                      | 0.50              | speed corr.             | 0.54              |                      |
| reaction time:             |                   |                      |                   |                         |                   |                      |
| n.n. align:                | 0.69              | 0.41                 | 0.49              | n.n. align:             | 0.86              | 0.44                 |
| n.n. dist.:                |                   | -0.63                |                   | n.n. dist.:             |                   | -0.61                |
| group size:                |                   | 0.75                 |                   | group size:             | 0.44              | 0.83                 |

  

| Females: Predation (N=624) |                   |                   |                  | <i>No reaction time</i> |                   |                   |                   |
|----------------------------|-------------------|-------------------|------------------|-------------------------|-------------------|-------------------|-------------------|
|                            | Activity<br>(31%) | Factor 2<br>(13%) | Factor 3<br>(7%) |                         | Activity<br>(35%) | Factor 2<br>(16%) | Factor 3<br>(11%) |
| speed                      | 0.84              |                   |                  | speed                   | 0.86              |                   |                   |
| turning rate               | -0.93             |                   |                  | turning rate            | -0.92             |                   |                   |
| dist. from centre          |                   |                   |                  | dist. from centre       |                   |                   |                   |
| speed corr.                |                   |                   |                  | speed corr.             |                   |                   |                   |
| reaction time:             |                   | -0.61             |                  |                         |                   |                   |                   |
| n.n. align:                | 0.95              |                   |                  | n.n. align:             | 0.93              |                   |                   |
| n.n. dist.:                |                   |                   | -0.55            | n.n. dist.:             |                   | 0.99              |                   |
| group size:                |                   | 0.66              |                  | group size:             |                   |                   | 0.79              |

  

| Females: Sorting round 1 (N=384) |                      |                   |                   | <i>No reaction time</i> |                   |
|----------------------------------|----------------------|-------------------|-------------------|-------------------------|-------------------|
|                                  | Sociability<br>(26%) | Activity<br>(22%) |                   | Sociability<br>(29%)    | Activity<br>(26%) |
| speed                            |                      | 0.71              | speed             |                         | 0.72              |
| turning rate                     |                      | -0.67             | turning rate      |                         | -0.66             |
| dist. from centre                |                      |                   | dist. from centre |                         |                   |
| speed corr.                      | 0.42                 |                   | speed corr.       | 0.42                    |                   |
| reaction time:                   |                      |                   |                   |                         |                   |
| n.n. align:                      | 0.58                 | 0.81              | n.n. align:       | 0.56                    | 0.83              |
| n.n. dist.:                      | -0.95                |                   | n.n. dist.:       | -0.95                   |                   |
| group size:                      | 0.71                 |                   | group size:       | 0.71                    |                   |

| Females: Combined (N=696) |                   |                      |
|---------------------------|-------------------|----------------------|
|                           | Activity<br>(28%) | Sociability<br>(18%) |
| speed                     | 0.79              |                      |
| turning rate              | -0.79             |                      |
| dist. from centre         |                   |                      |
| speed corr.               |                   |                      |
| reaction time:            |                   |                      |
| n.n. align:               | 0.90              | 0.42                 |
| n.n. dist.:               |                   | -0.78                |
| group size:               |                   | 0.65                 |

| <i>No reaction time</i> |                   |                      |
|-------------------------|-------------------|----------------------|
|                         | Activity<br>(29%) | Sociability<br>(24%) |
| speed                   | 0.75              |                      |
| turning rate            | -0.77             |                      |
| dist. from centre       |                   |                      |
| speed corr.             |                   | 0.45                 |
| reaction time:          |                   |                      |
| n.n. align:             | 0.85              | 0.52                 |
| n.n. dist.:             |                   | -0.87                |
| group size:             |                   | 0.65                 |

| Males: Selection (N=224) |                   |                      |
|--------------------------|-------------------|----------------------|
|                          | Activity<br>(33%) | Sociability<br>(19%) |
| speed                    | 0.82              |                      |
| turning rate             | -0.81             |                      |
| dist. from centre        |                   |                      |
| speed corr.              | 0.47              | 0.41                 |
| reaction time:           |                   |                      |
| n.n. align:              | 0.90              |                      |
| n.n. dist.:              |                   | -0.69                |
| group size:              | 0.46              | 0.71                 |

| <i>No reaction time</i> |                   |                      |
|-------------------------|-------------------|----------------------|
|                         | Activity<br>(39%) | Sociability<br>(18%) |
| speed                   | 0.83              |                      |
| turning rate            | -0.81             |                      |
| dist. from centre       |                   |                      |
| speed corr.             | 0.49              |                      |
| reaction time:          |                   |                      |
| n.n. align:             | 0.92              |                      |
| n.n. dist.:             |                   | -0.65                |
| group size:             | 0.49              | 0.71                 |

| Males: Predation (N=408) |                      |                   |
|--------------------------|----------------------|-------------------|
|                          | Sociability<br>(24%) | Activity<br>(23%) |
| speed                    |                      | 0.72              |
| turning rate             |                      | -0.95             |
| dist. from centre        |                      |                   |
| speed corr.              |                      |                   |
| reaction time:           |                      |                   |
| n.n. align:              | 0.67                 | 0.56              |
| n.n. dist.:              | -0.59                |                   |
| group size:              | 0.85                 |                   |

| <i>No reaction time</i> |                      |                   |
|-------------------------|----------------------|-------------------|
|                         | Sociability<br>(26%) | Activity<br>(25%) |
| speed                   |                      | 0.73              |
| turning rate            |                      | -0.94             |
| dist. from centre       |                      |                   |
| speed corr.             |                      |                   |
| reaction time:          |                      |                   |
| n.n. align:             | 0.69                 | 0.55              |
| n.n. dist.:             | -0.60                |                   |
| group size:             | 0.85                 |                   |

| Males: Combined (N=448) |                      |                   |
|-------------------------|----------------------|-------------------|
|                         | Sociability<br>(26%) | Activity<br>(22%) |
| speed                   |                      | 0.74              |
| turning rate            |                      | -0.81             |
| dist. from centre       |                      |                   |
| speed corr.             | 0.44                 |                   |
| reaction time:          |                      |                   |
| n.n. align:             | 0.63                 | 0.66              |
| n.n. dist.:             | -0.59                |                   |
| group size:             | 0.91                 |                   |

| <i>No reaction time</i> |                      |                   |
|-------------------------|----------------------|-------------------|
|                         | Sociability<br>(27%) | Activity<br>(25%) |
| speed                   |                      | 0.75              |
| turning rate            |                      | -0.83             |
| dist. from centre       |                      |                   |
| speed corr.             | 0.42                 |                   |
| reaction time:          |                      |                   |
| n.n. align:             | 0.64                 | 0.64              |
| n.n. dist.:             | -0.61                |                   |
| group size:             | 0.86                 |                   |

| All data (N=896)  |                   |                      | <i>No reaction time</i> |                   |                      |
|-------------------|-------------------|----------------------|-------------------------|-------------------|----------------------|
|                   | Activity<br>(25%) | Sociability<br>(21%) |                         | Activity<br>(29%) | Sociability<br>(23%) |
| speed             | 0.77              |                      | speed                   | 0.78              |                      |
| turning rate      | -0.82             |                      | turning rate            | -0.79             |                      |
| dist. from centre |                   |                      | dist. from centre       |                   |                      |
| speed corr.       |                   |                      | speed corr.             |                   |                      |
| reaction time:    |                   |                      |                         |                   |                      |
| n.n. align:       | 0.78              | 0.53                 | n.n. align:             | 0.78              | 0.55                 |
| n.n. dist.:       |                   | -0.69                | n.n. dist.:             |                   | -0.72                |
| group size:       |                   | 0.76                 | group size:             |                   | 0.75                 |
